# Supplementary material
Source: publisher figshare collection journal article supplement (https://karger.figshare.com/ndownloader/files/30821950)
Supplement: Supplementary file 1 [file 30821950]

Supplementary Fig. S1 Schematic diagram for miR-3929 regulating the proliferation and apoptosis of cervical cancer cells by targeting Cripto-1.
